# Supplementary material for: Path integration in large-scale space and with novel geometries: Comparing vector addition and encoding-error models
Source: PLoS Comput Biol. 2020 May 7;16(5):e1007489. doi: 10.1371/journal.pcbi.1007489 (PMC7244182; doi:10.1371/journal.pcbi.1007489)
Supplement: S1 Table — (XLSX) [file pcbi.1007489.s001.xlsx]

## Sheet: Sheet1
∠bc	∠ab	∠ca	Side A (m)	Side B (m)	Side C (m)	Perimeter (m)	Type
60	100	20	8.79385	3.47296	10	22.267	scalene
30	120	30	5.7735	5.7735	10	21.547	isosceles
45	105	30	7.32051	5.17638	10	22.497	scalene
60	90	30	8.66025	5	10	23.66	right
60	75	45	8.96575	7.32051	10	26.286	scalene
45	90	45	7.07107	7.07107	10	24.142	isosceles-right
60	60	60	10	10	10	30	equilateral
